# Supplementary material
Source: ML conference proceedings conference paper supplement (https://openaccess.thecvf.com/content/CVPR2024/html/Blau_GRAM_Global_Reasoning_CVPR_2024_paper.html)
Supplement: Supplementary file 1 [file Blau_GRAM_Global_Reasoning_CVPR_2024_supplemental.pdf]

# GRAM: Global Reasoning for Multi-Page VQA

## Supplementary Material

| Group                           | Parameter Name                        | Parameter Value |
|---------------------------------|---------------------------------------|-----------------|
| fine-tune                       | batch size                            | 8               |
|                                 | training steps                        | 200K            |
|                                 | warmup steps                          | 1000            |
|                                 | fp16                                  | True            |
|                                 | training number of pages              | 4               |
|                                 | evaluation number of pages            | unlimited       |
|                                 | number of image tokens                | 128             |
| DocFormer <sub>concat</sub> [1] | encoder learning rate                 | 3e-5            |
|                                 | decoder learning rate                 | 3e-5            |
|                                 | training text tokens per page         | 600             |
|                                 | inference text tokens per page        | 400             |
| HiVT5* [4]                      | encoder learning rate                 | 3e-5            |
|                                 | decoder learning rate                 | 3e-5            |
|                                 | training text tokens per page         | 800             |
|                                 | inference text tokens per page        | 8000            |
|                                 | number of compression tokens per page | 10              |
| GRAM                            | encoder learning rate                 | 3e-5            |
|                                 | decoder learning rate                 | 3e-5            |
|                                 | global encoder learning rate          | 1e-4            |
|                                 | training text tokens per page         | 800             |
|                                 | inference text tokens per page        | 8000            |
|                                 | number of global tokens               | 32              |
|                                 | bias adaptation constant 'c'          | 20              |
| GRAM <sub>C-Former</sub>        | encoder learning rate                 | 3e-5            |
|                                 | decoder learning rate                 | 3e-5            |
|                                 | global encoder learning rate          | 1e-4            |
|                                 | C-Former learning rate                | 1e-4            |
|                                 | training text tokens per page         | 800             |
|                                 | inference text tokens per page        | 8000            |
|                                 | number of global tokens               | 32              |
|                                 | bias adaptation constant 'c'          | 20              |
| compression length              | 256                                   |                 |

Table 1. Hyper-Parameters.

### A. Parameters

We present in Tab. 1 all of the relevant hyperparameters.

### B. Inference Resources Consumption

We compare three key properties of MP-DocVQA baselines and our method: inference time, memory consumption, and maximal document length. The latency and memory consumption are illustrated in Fig. 1 and Fig. 2, respectively, both as functions of the number of pages in the document. We compare the following baselines: DocFormerv2<sub>concat</sub> [1], Hi-VT5\* [4], and our GRAM and GRAM<sub>C-Former</sub>, utilizing the same computational resources employed in all experiments— $8 \times A100$  GPUs with 40GB of memory.

The memory consumption of DocFormerv2<sub>concat</sub> [1] reaches its maximum capacity for documents with only 20 pages, while our method efficiently processes documents, spanning hundreds of pages. Moreover, the presented figures demonstrate that GRAM<sub>C-Former</sub> maintains a com-

parable memory footprint to the GRAM model. Nevertheless, there is potential for improvement, as HiVT5\* exhibits lower memory consumption. Despite this, we achieve inference times similar to HiVT5\* [4], accompanied by a noteworthy enhancement in ANLS.

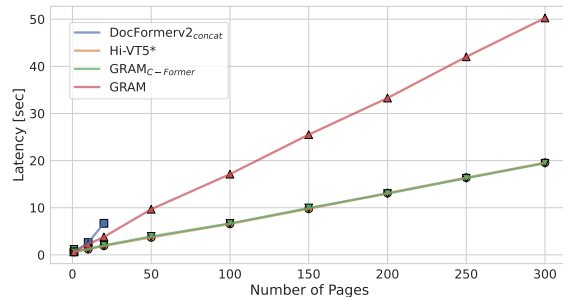

Figure 1. Latency comparison. We compare the dependency between overall latency and the number of pages in input document.

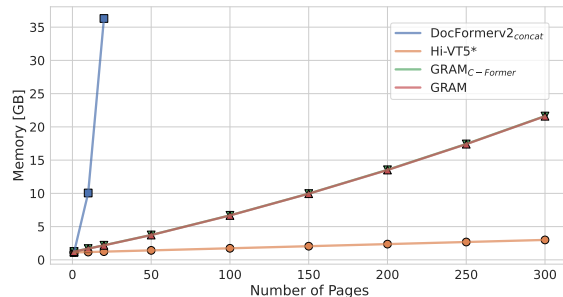

Figure 2. Memory consumption comparison. We compare the dependency between overall memory consumption and the number of pages in input document.

### C. Qualitative Results

Finally, we present a few qualitative results on the DUDE dataset in Fig. 3, showcasing the advantages of our approach over Hi-VT5\* [4]. In the first three examples, we demonstrate cases where GRAM is correct and HiVT5\* is wrong. The last two examples present cases where both our method and HiVT5\* are incorrect.

### D. Comparison with DocFormerv2<sub>concat</sub>

We provide additional qualitative examples with DocFormerv2<sub>concat</sub>. Examples demonstrate the effectiveness of GRAM in tackling questions that involve multiple pages in the document.

| Method                            | ANLS by Number of Pages<br>DUDE validation dataset |              |              |              |              |
|-----------------------------------|----------------------------------------------------|--------------|--------------|--------------|--------------|
|                                   | All                                                | 1            | 2-4          | 5-10         | 11-end       |
| GRAM                              | <b>47.88</b>                                       | <b>49.29</b> | <b>49.90</b> | <b>45.90</b> | <b>43.94</b> |
| DocFormerv2 <sub>concat</sub>     | 44.32                                              | 46.08        | 47.05        | 42.81        | 38.17        |
| DocFormerV2 <sub>Longformer</sub> | 45.88                                              | 47.01        | 47.75        | 43.22        | 43.13        |
| DocFormerV2 <sub>AliBi</sub>      | 34.73                                              | 36.55        | 37.00        | 30.99        | 31.25        |

Table 2. **Comparison to NLP methods.** Results on DUDE validation comparing GRAM with LongFormer [2] and AliBi [3].

## E. Comparison with NLP-based Approaches

We present additional experiments, comparing GRAM with two NLP-based approaches: the sparse attention-based LongFormer [2], and the bias-based AliBi [3]. Both approaches are implemented on top of DocFormerv2 for fair comparison. Results in Tab. 2 shows an advantage in our local-global approach of utilizing existing powerful models for single-page and extending them to support the multi-page scenario.

## References

- [1] Srikar Appalaraju, Peng Tang, Qi Dong, Nishant Sankaran, Yichu Zhou, and R Manmatha. Docformerv2: Local features for document understanding. *arXiv preprint arXiv:2306.01733*, 2023. 1
- [2] Iz Beltagy, Matthew E Peters, and Arman Cohan. Longformer: The long-document transformer. *arXiv preprint arXiv:2004.05150*, 2020. 2
- [3] Ofir Press, Noah A Smith, and Mike Lewis. Train short, test long: Attention with linear biases enables input length extrapolation. *arXiv preprint arXiv:2108.12409*, 2021. 2
- [4] Rubèn Tito, Dimosthenis Karatzas, and Ernest Valveny. Hierarchical multimodal transformers for multi-page docvqa. *arXiv preprint arXiv:2212.05935*, 2022. 1, 3

How many chapters are in the books? correct answer: ""

HiVT5: "4"

GRAM: ""

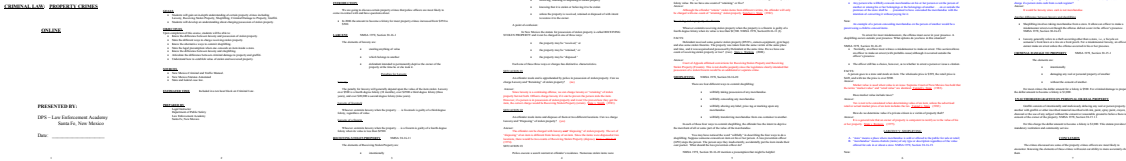

How many types of complaints were listed in the document? correct answer: "9"

HiVT5: "10"

GRAM: "9"

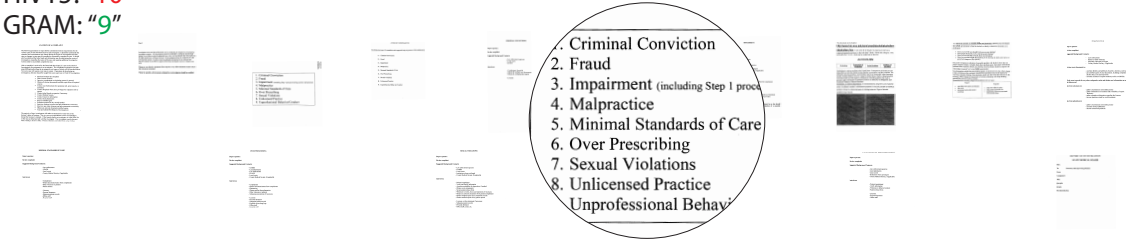

how many pages are there in this text? correct answer: "9"

HiVT5: "1"

GRAM: "9"

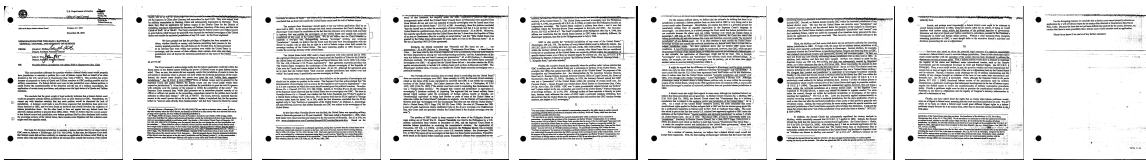

Which pages show graphs? correct answer: "[3, '6', '5']"

HiVT5: "1"

GRAM: "2"

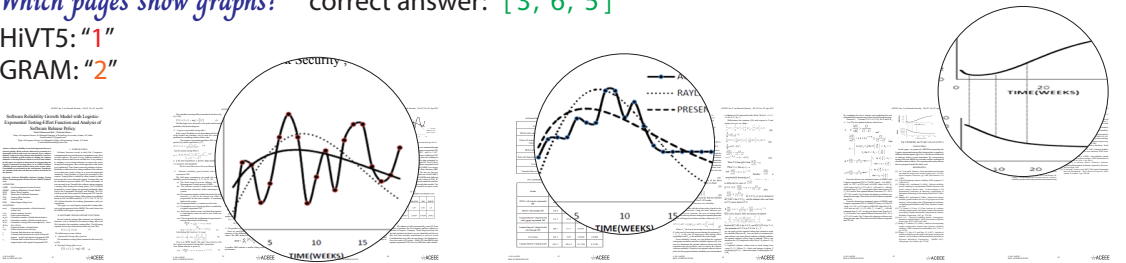

Can real property be improved within a mortgage loan? correct answer: "The within mortgage does not cover real property improved"

HiVT5: ""

GRAM: ""

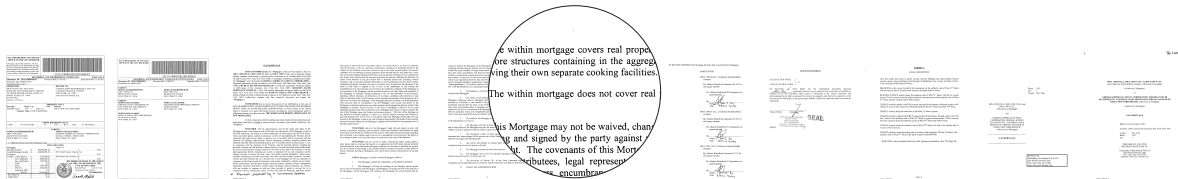

Figure 3. Qualitative comparison between our approach and Hi-VT5 [4] indicates that the integration of our global-local encoder enhances reasoning capabilities, especially when inquiries require multi-page context.

Question: Explain Criminals in Love

GT answer: "Tragi-comedy play. Tells the story of Junior who is forced into criminal activity by his father"

GRAM: "It is a tragi-comedy which tells the story of junior and his passionate love for gail, whose dreams for a simple life go awry when junior's father, a chronic offender, coerces him into criminal activity. One by one, more of junior's friends attempt to help him, but are forced into the gang led by his aunt wineva"

DocFormer concat: "3"

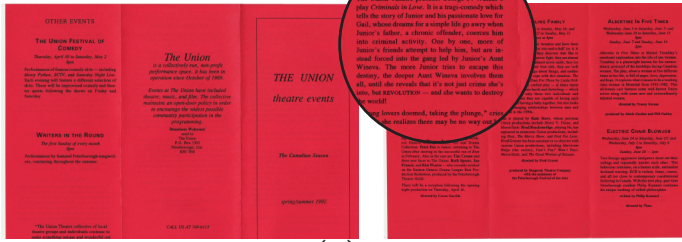

(a)

Question: How many paragraphs are 1 page 1

GT answer: "3"

GRAM: "3"

DocFormer concat: "6"

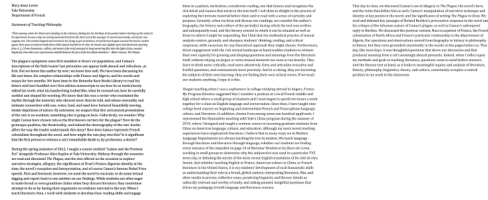

(b)

Question: Which subject use in this document?

GT answer: "3"

GRAM: "Location Map"

DocFormer concat: "3"

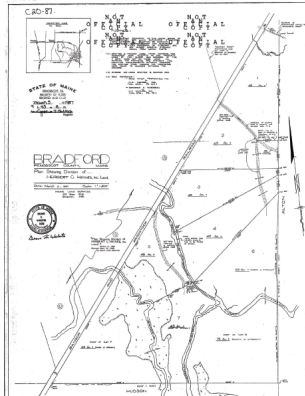

(c)

Question: How many pages with different colors are there in the document?

GT answer: "3"

GRAM: "3"

DocFormer concat: "2"

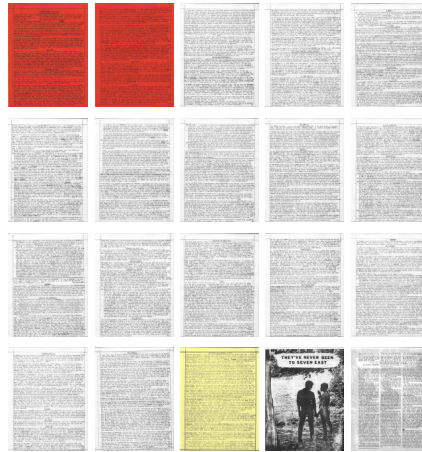

(d)

Question: Does the signature belong to the same person listed at the top of the form?

GT answer: "Yes"

GRAM: "Yes"

256 tokens GRAM: "BRIAN FRESKO"

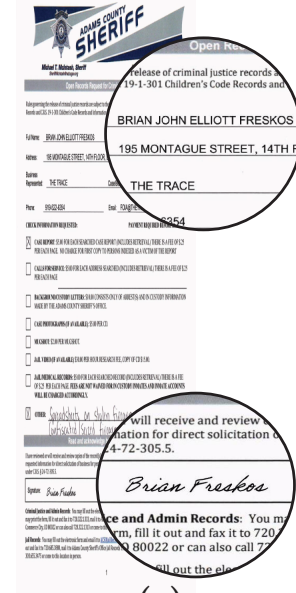

(e)

Figure 4. Comparisons between DocFormerV2\_concat and GRAM.
